# Supplementary material for: Dietary Short-Term Fiber Interventions in Arthritis Patients Increase Systemic SCFA Levels and Regulate Inflammation
Source: PubMed Central journal article supplement (PMC7589100; doi:10.3390/nu12103207), 2020-10-20
Supplement: nutrients-12-03207-s001.pdf [file nutrients-12-03207-s001.pdf]

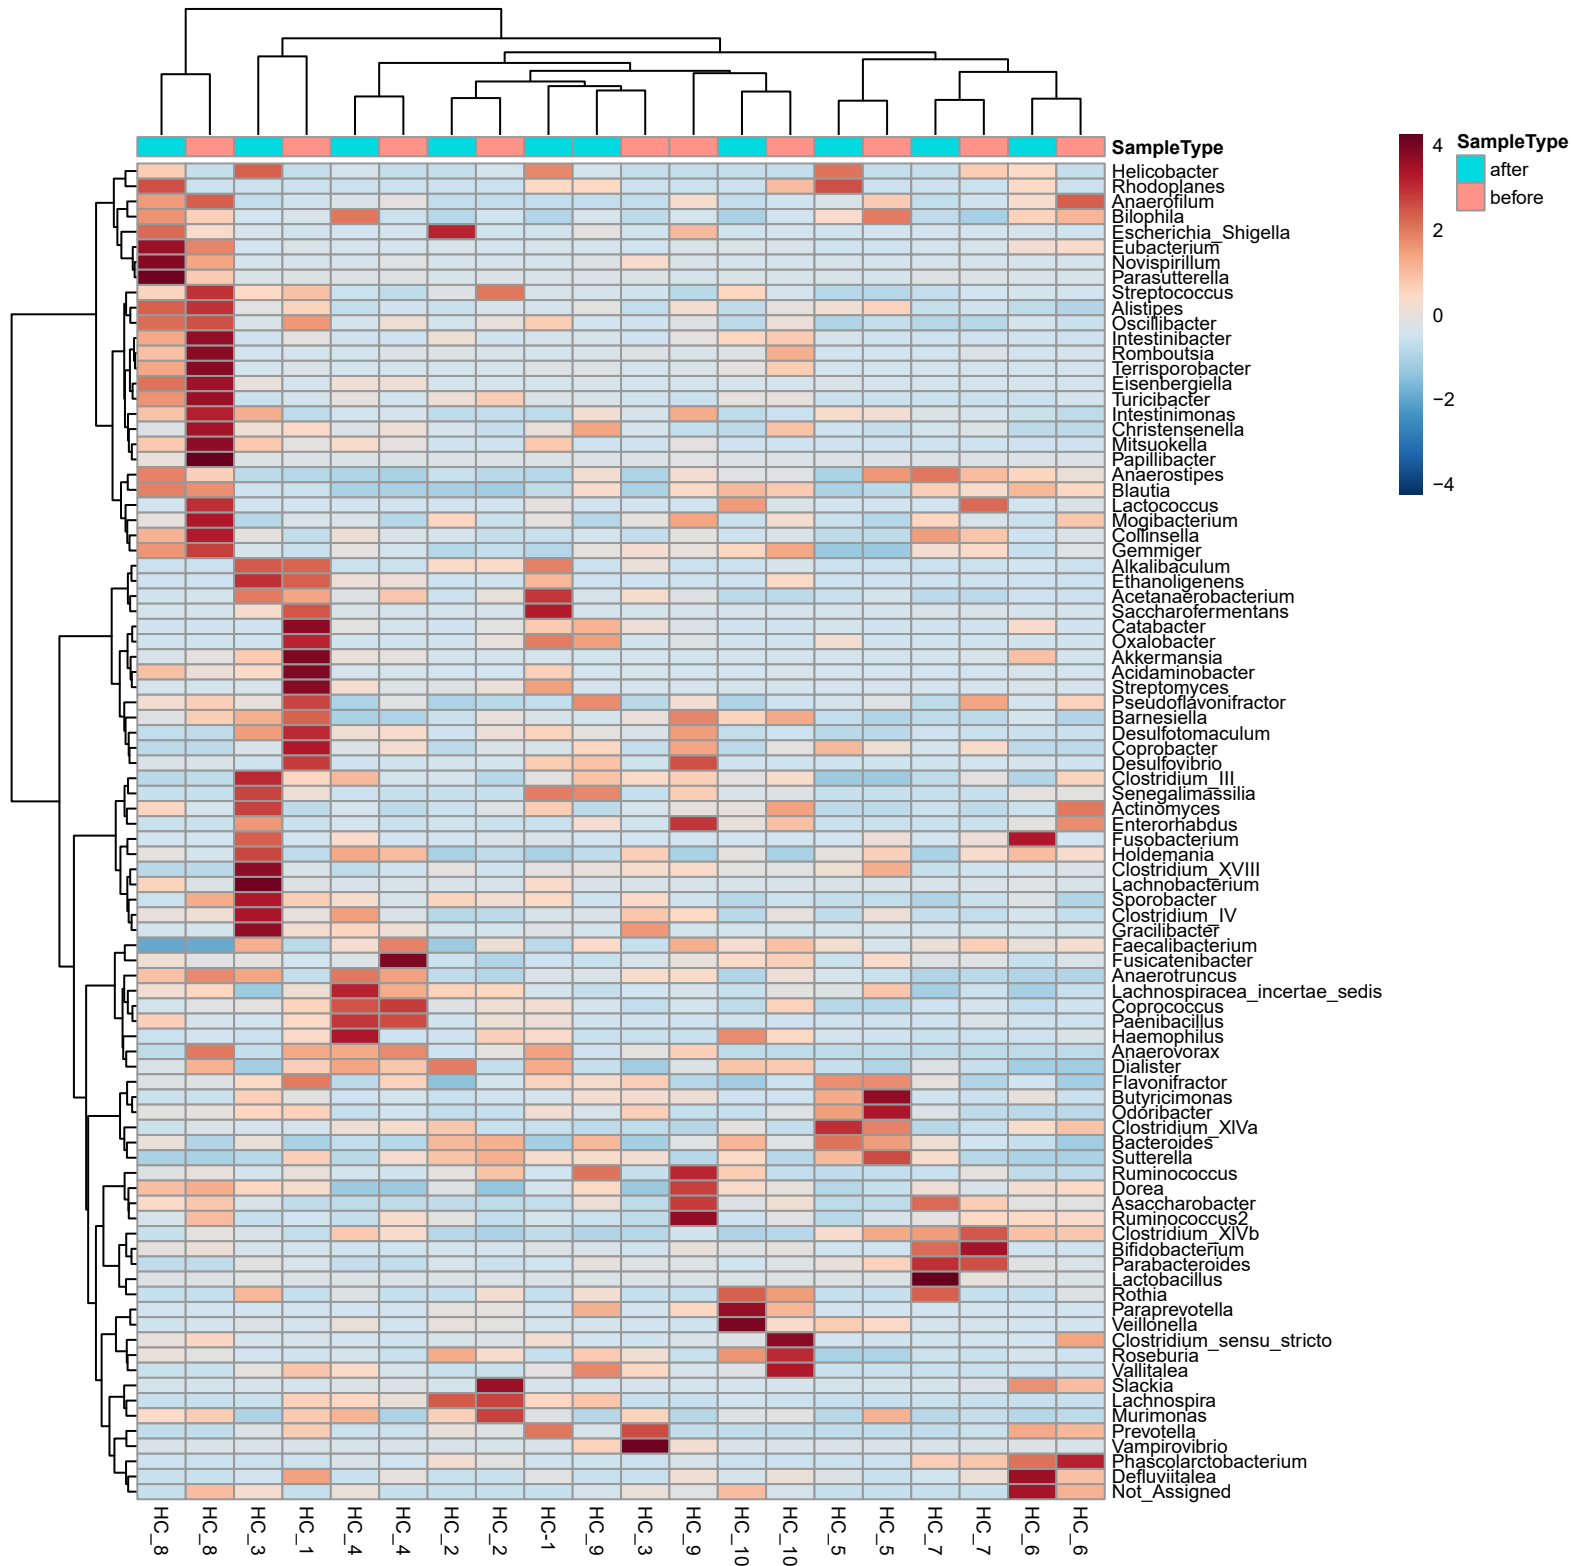

Supplemental Figure 1: 16S rRNA sequencing results from healthy controls (HC) (n=10) before (Day 0) and after (Day 28) high-fiber diet interventions shown as heatmap for the genus levels.

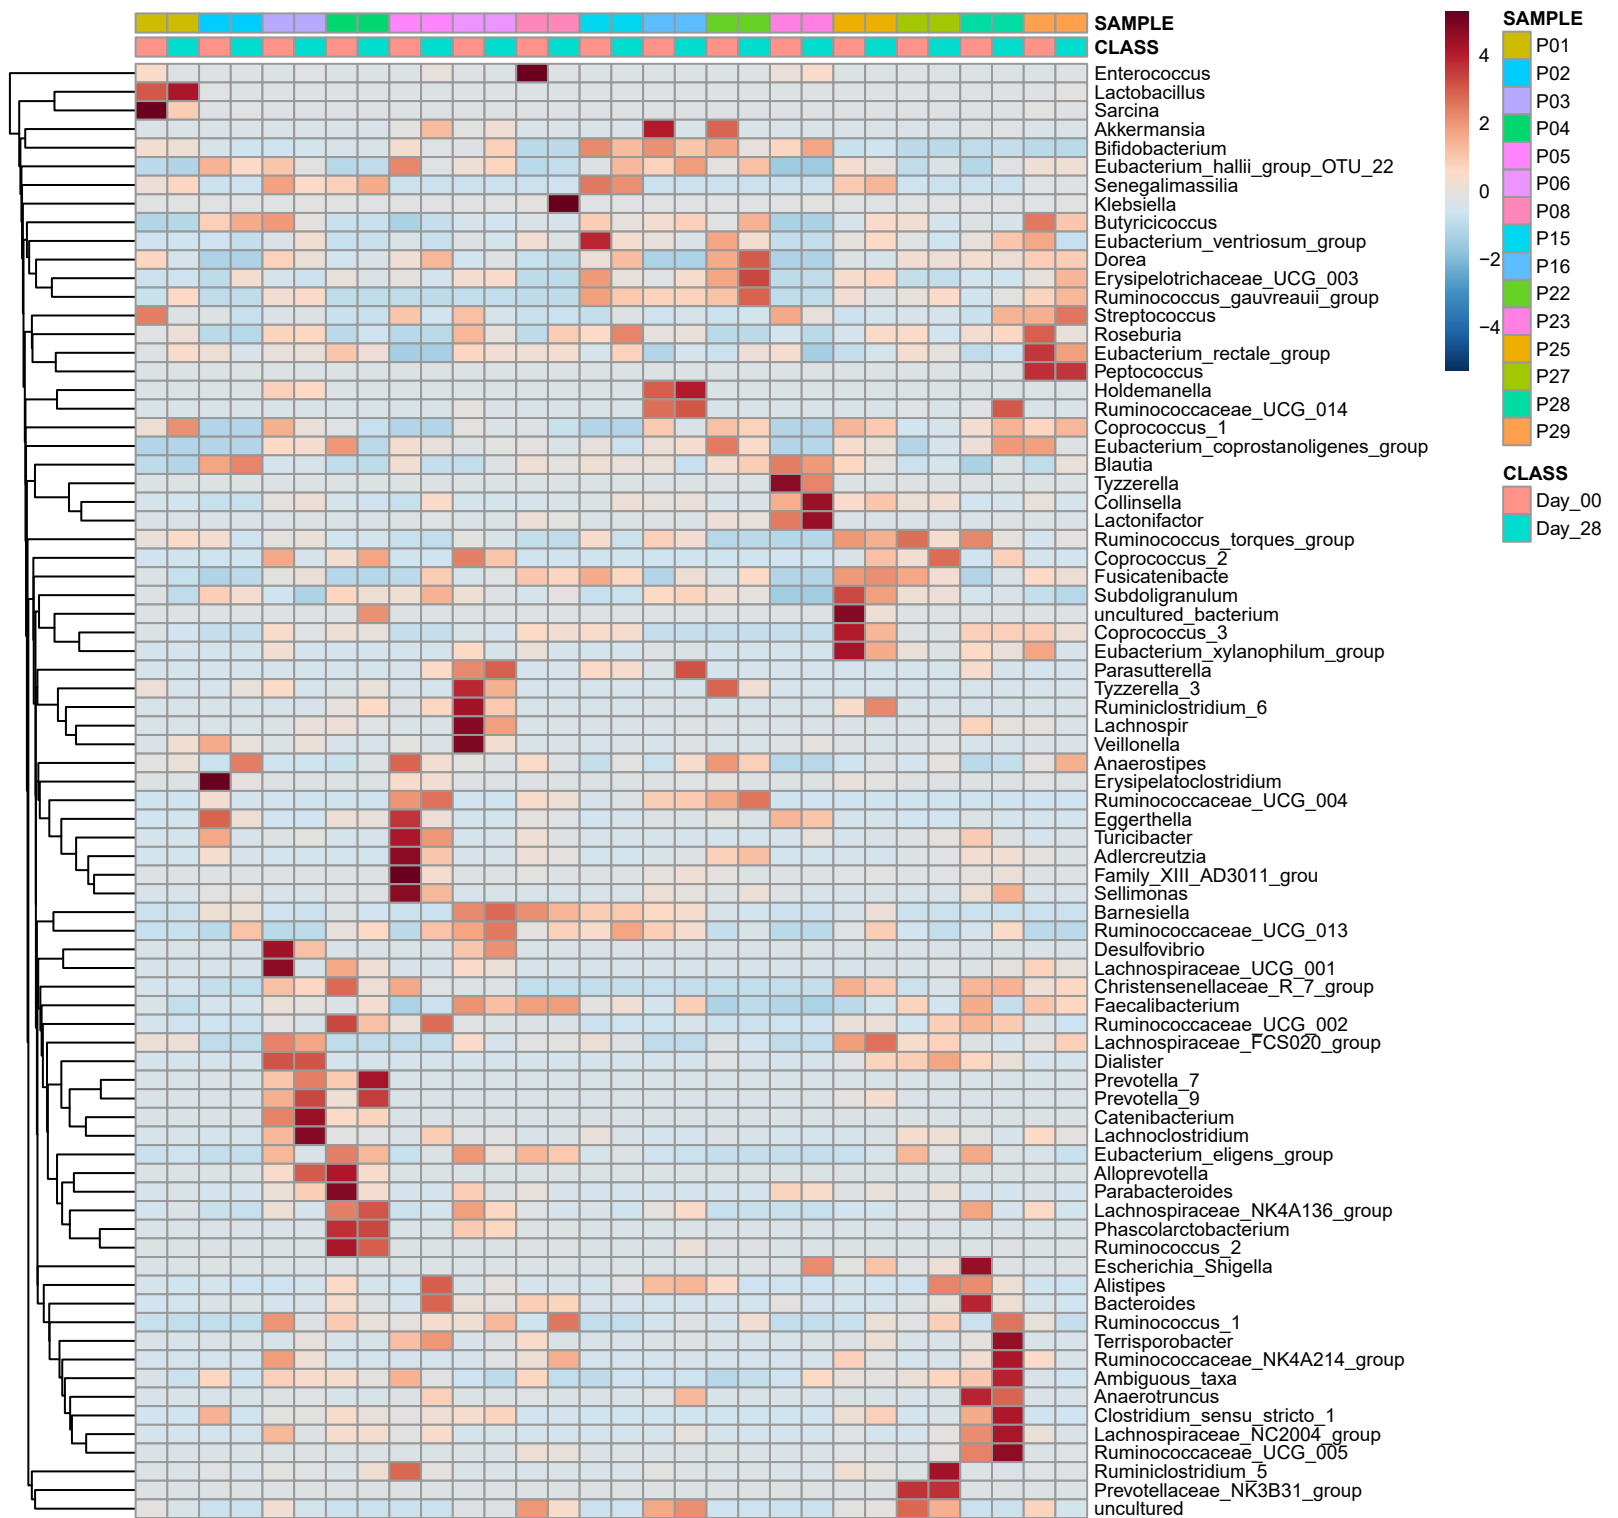

**Supplemental Figure 2.** 16S rRNA sequencing results from RA patients (n=15) before (Day 0) and after (Day 28) high-fiber diet interventions shown as heatmap on the genus levels.
